# Supplementary material for: Female Pelvic Floor Dysfunction Continues to Negatively Impact Quality-of-Life during the COVID-19 Lockdown
Source: MDPI journal article supplement (doi:10.3390/jcm10051075), 2021-03-05
Supplement: s1 [file s1]

**Figure S1:** Questionnaire Covid-19 lockdown and pelvic floor issues

|                                                                                                                                                                                                                                                                                                                                                                                                                                                                                                                                                                                                                                                                                                                                                                                                                                                                                                                                                                                                                                                                                                                                                                                                                                                                                                                                                                                                                                                                                                                                                                                                                                                                                                                                                                                                                                                                                                                                                                                                                                                                                                                                                                                                                                                                                                                                                                                                                                                                                                                                                                                                                                                                                                                                                                                                                                                                          |
|--------------------------------------------------------------------------------------------------------------------------------------------------------------------------------------------------------------------------------------------------------------------------------------------------------------------------------------------------------------------------------------------------------------------------------------------------------------------------------------------------------------------------------------------------------------------------------------------------------------------------------------------------------------------------------------------------------------------------------------------------------------------------------------------------------------------------------------------------------------------------------------------------------------------------------------------------------------------------------------------------------------------------------------------------------------------------------------------------------------------------------------------------------------------------------------------------------------------------------------------------------------------------------------------------------------------------------------------------------------------------------------------------------------------------------------------------------------------------------------------------------------------------------------------------------------------------------------------------------------------------------------------------------------------------------------------------------------------------------------------------------------------------------------------------------------------------------------------------------------------------------------------------------------------------------------------------------------------------------------------------------------------------------------------------------------------------------------------------------------------------------------------------------------------------------------------------------------------------------------------------------------------------------------------------------------------------------------------------------------------------------------------------------------------------------------------------------------------------------------------------------------------------------------------------------------------------------------------------------------------------------------------------------------------------------------------------------------------------------------------------------------------------------------------------------------------------------------------------------------------------|
| <p><b>General:</b></p> <ol style="list-style-type: none"><li>1. How has the Covid-19 lockdown influenced your quality of life?<ul style="list-style-type: none"><li>o Not at all</li><li>o Quite a bit</li><li>o A lot</li></ul></li><li>2. On a scale of 0-10 what relevance did you give your urogynecological issue BEFORE the Covid-19 lockdown?<br/>no relevance (0) - highest relevance (10)</li><li>3. On a scale of 0-10 what relevance did you give your urogynecological issue DURING the Covid-19 lockdown?<br/>no relevance (0) - highest relevance (10)</li><li>4. What urogynecological issue do you suffer from?<ul style="list-style-type: none"><li>o Urinary incontinence (continue with section "urinary incontinence")</li><li>o Prolapse (continue with section "prolapse")</li></ul></li></ol> <p><b>Urinary incontinence:</b></p> <ol style="list-style-type: none"><li>5. Did you suffer from urinary incontinence during the Covid-19 lockdown?<ul style="list-style-type: none"><li>o no</li><li>o yes</li></ul></li><li>6. How relevant did your urinary incontinence affliction feel during the Covid-19 lockdown?<ul style="list-style-type: none"><li>o less relevant during the Covid-19 lockdown than before</li><li>o just as relevant during the Covid-19 lockdown as before</li><li>o more relevant during the Covid-19 lockdown than before</li></ul></li><li>7. How did your urinary incontinence afflict you during the Covid-19 lockdown?<ul style="list-style-type: none"><li>o Not at all</li><li>o Quite a bit</li><li>o A lot</li></ul></li></ol> <p><b>Prolapse:</b></p> <ol style="list-style-type: none"><li>8. Did you suffer from prolapse-symptoms during the Covid-19 lockdown?<ul style="list-style-type: none"><li>o No</li><li>o Yes</li></ul></li><li>9. How relevant did your prolapse feel during the Covid-19 lockdown?<ul style="list-style-type: none"><li>o less relevant during the Covid-19 lockdown than before</li><li>o just as relevant during the Covid-19 lockdown as before</li><li>o more relevant during the Covid-19 lockdown than before</li></ul></li><li>10. How did your prolapse afflict you during the Covid-19 lockdown?<ul style="list-style-type: none"><li>o Not at all</li><li>o Quite a bit</li><li>o A lot</li></ul></li></ol> <p><b>Sexual function:</b></p> <ol style="list-style-type: none"><li>11. Has the Covid-19 lockdown influenced your sexual life?<ul style="list-style-type: none"><li>o Not at all</li><li>o Some</li><li>o A lot</li></ul></li><li>12. On a scale of 0-10 what relevance did you give your sexual life BEFORE the Covid-19 lockdown?<br/>no relevance (0) - highest relevance (10)</li><li>13. On a scale of 0-10 what relevance did you give your sexual life DURING the Covid-19 lockdown?<br/>no relevance (0) - highest relevance (10)</li></ol> |
|--------------------------------------------------------------------------------------------------------------------------------------------------------------------------------------------------------------------------------------------------------------------------------------------------------------------------------------------------------------------------------------------------------------------------------------------------------------------------------------------------------------------------------------------------------------------------------------------------------------------------------------------------------------------------------------------------------------------------------------------------------------------------------------------------------------------------------------------------------------------------------------------------------------------------------------------------------------------------------------------------------------------------------------------------------------------------------------------------------------------------------------------------------------------------------------------------------------------------------------------------------------------------------------------------------------------------------------------------------------------------------------------------------------------------------------------------------------------------------------------------------------------------------------------------------------------------------------------------------------------------------------------------------------------------------------------------------------------------------------------------------------------------------------------------------------------------------------------------------------------------------------------------------------------------------------------------------------------------------------------------------------------------------------------------------------------------------------------------------------------------------------------------------------------------------------------------------------------------------------------------------------------------------------------------------------------------------------------------------------------------------------------------------------------------------------------------------------------------------------------------------------------------------------------------------------------------------------------------------------------------------------------------------------------------------------------------------------------------------------------------------------------------------------------------------------------------------------------------------------------------|
